# Supplementary material for: Colorimetric sensing of imidacloprid in cucumber fruits using a graphene quantum dot/Au (III) chemosensor
Source: PubMed Central journal article supplement (PMC7459307; doi:10.1038/s41598-020-71349-4), 2020-08-31
Supplement: 41598_2020_71349_MOESM1_ESM.pdf [file 41598_2020_71349_MOESM1_ESM.pdf]

## Supplementary information

### Colorimetric sensing of imidacloprid in cucumber fruits using a graphene quantum dot/Au (III) chemosensor

Saeedeh Babazadeh<sup>1</sup>, Parviz Ahmadi Moghaddam<sup>1\*</sup>, Sajjad Keshipour<sup>2\*</sup> & Kaveh Mollazade<sup>3</sup>

<sup>1</sup>Department of Mechanical Engineering of Biosystems, Faculty of Agriculture, Urmia University, 11 km Sero Road, Urmia, Iran.

<sup>2</sup>Department of Nanochemistry, Nanotechnology Research Center, Urmia University, Shahid Beheshti St., Urmia, Iran.

<sup>3</sup>Department of Biosystems Engineering, Faculty of Agriculture, University of Kurdistan, Sanandaj, Iran.

\*email: [p.ahmadi@urmia.ac.ir](mailto:p.ahmadi@urmia.ac.ir); [s.keshipour@urmia.ac.ir](mailto:s.keshipour@urmia.ac.ir)

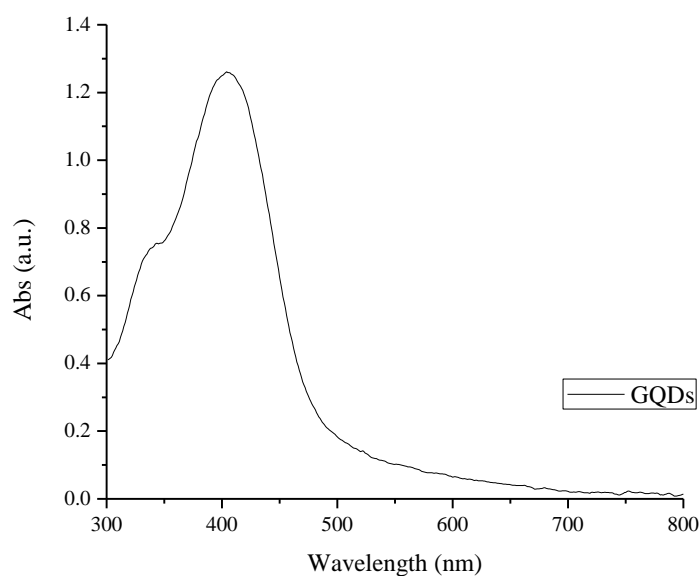

**Supplementary Figure S1.** The UV-Vis absorption spectrum of GQDs.

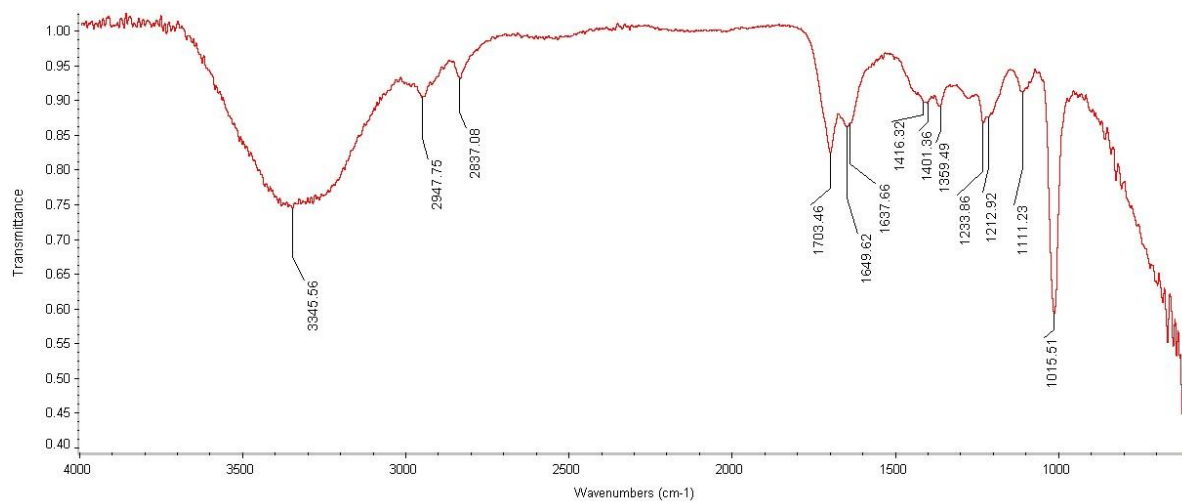

**Supplementary Figure S2.** FT-IR spectrum of GQDs.

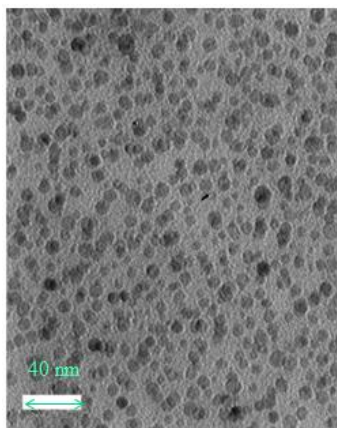

**Supplementary Figure S3.** TEM image of GQDs (the scale bar is 40 nm).

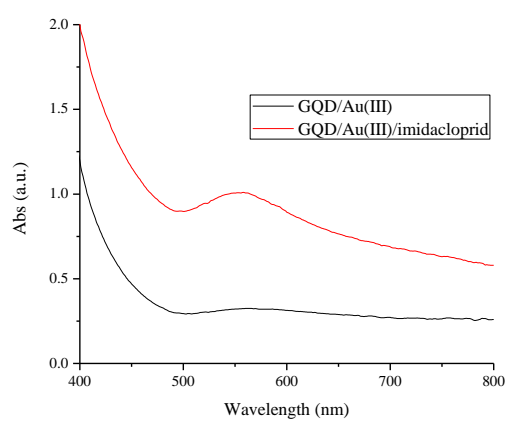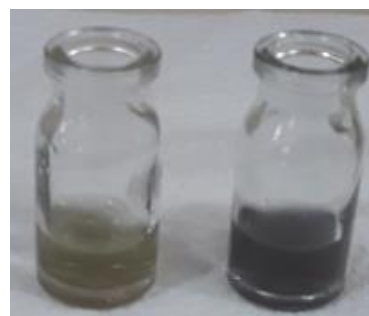

**(a)**

**(b)**

**Supplementary Figure S4.** UV-Vis spectrum **(a)** and the image **(b)** of GQD/Au (III) in the absence (grey) and presence (reddish grey) of imidacloprid after half an hour.

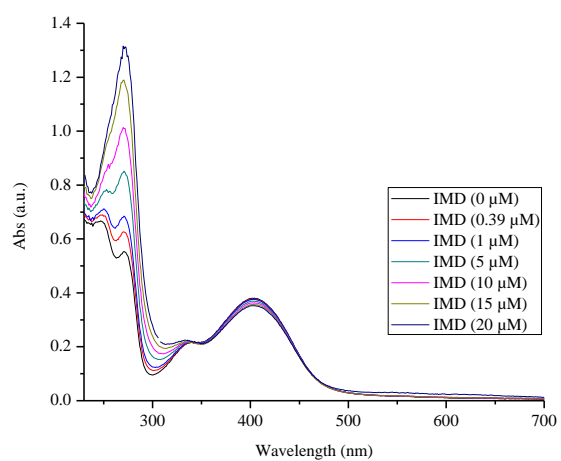

(a)

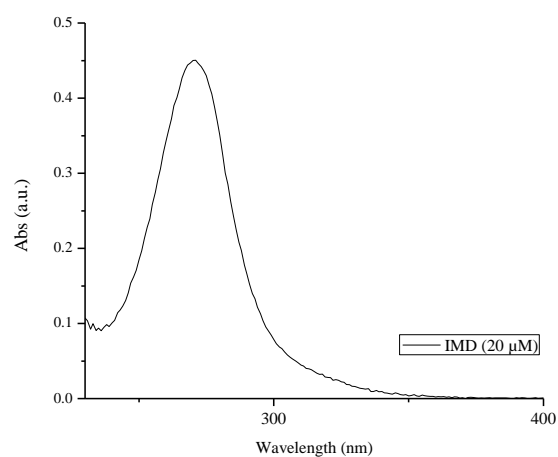

(b)

**Supplementary Figure S5.** (a) The UV-Vis absorbance spectra of GQDs in the presence of imidacloprid (0-20  $\mu\text{M}$ ) and (b) the absorbance of imidacloprid (IMD) at the concentration of 20  $\mu\text{M}$ .

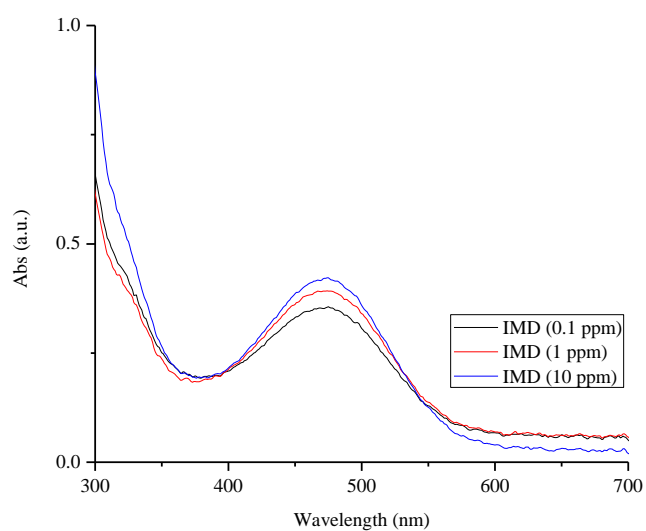

**Supplementary Figure S6.** The UV-Vis spectra of Au (III) solutions with the addition of three concentrations of imidacloprid (0.1, 1, and 10 ppm).

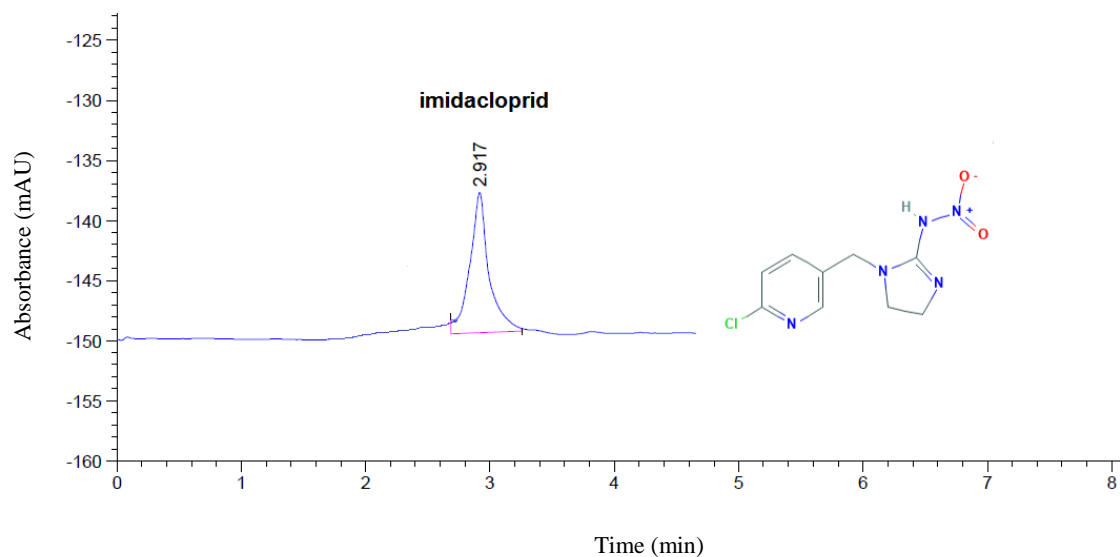

**Supplementary Figure S7.** The chemical structure and chromatogram of imidacloprid.

|                                     |       |      |     |     |     |     |     |     |     |     |      |
|-------------------------------------|-------|------|-----|-----|-----|-----|-----|-----|-----|-----|------|
| Concentration of imidacloprid (ppm) | 0.001 | 0.01 | 0.1 | 0.3 | 0.5 | 1   | 2   | 3   | 10  | 100 | 1000 |
| $\lambda_{\max}$ (nm)               | 533   | 534  | 534 | 533 | 532 | 534 | 536 | 538 | 540 | 567 | -    |

**Supplementary Table S1.** The maximum absorbance wavelength ( $\lambda_{\max}$ ) in various concentrations of imidacloprid.

| Sample number | Harvesting time (day) | Imidacloprid (mg/kg) |
|---------------|-----------------------|----------------------|
| 29            | 1                     | 1.11                 |
| 33            | 2                     | 0.68                 |
| 37            | 4                     | 0.30                 |
| 41            | 8                     | 0.21                 |
| 45            | 15                    | 0.17                 |
| 49            | 21                    | 0.14                 |
| 53            | 25                    | 0.07                 |

**Supplementary Table S2.** The mean values of imidacloprid residues detected in cucumber samples by HPLC-DAD.
